# Supplementary material
Source: MDPI journal article supplement (https://www.mdpi.com/2311-5521/9/4/82)
Supplement: s1 [file s1]

# Dynamics of A Water Droplet Impacting an Ultrathin Layer of Oil Suspended on A Pool of Water

Amir Dehghanghadikolaei<sup>1</sup>, Bilal Abdul Halim<sup>1</sup>, Ehsan Khoshbakhhtnejad<sup>1</sup>, Hossein Sojoudi<sup>1,\*</sup>

<sup>1</sup> Department of Mechanical, Industrial, and Manufacturing Engineering, The University of Toledo, Toledo, OH 43606

\* Corresponding author: [hossein.sojoudi@utoledo.edu](mailto:hossein.sojoudi@utoledo.edu)

**Movie S1.** Represents different impact stages of a falling water droplet on an ultrathin layer of silicone oil suspended on a pool of water. The pool of water is large and deep enough to consider it semi-infinite pool. A droplet in size of  $d \approx 4.1$  mm was released from  $Z = 750$  mm on an ultrathin layer of silicone oil ( $\nu = 1$  cSt) suspended on a deep pool of water.

**Movie S2.** Represents different impact characteristics for different experimental conditions. (A) impact occurs on a deep pool of water without any suspended oil layer ( $H = 0$ ). (B) impact occurs on an ultrathin layer of silicone oil ( $\nu = 50$  cSt,  $H \approx 0$ ) suspended on a deep pool of water. (C) impact occurs on a thin layer of silicone oil ( $\nu = 50$  cSt,  $H = 3$  mm) suspended on a deep pool of water. (D) impact occurs on a thick layer of silicone oil ( $\nu = 50$  cSt,  $H = 5$  mm) suspended on a deep pool of water. (E) impact occurs on a thicker layer of silicone oil ( $\nu = 50$  cSt,  $H = 8$  mm) suspended on a deep pool of water. The difference between the impact characteristics is evident as the thickness of the oil layer decreases and reaches to an ultrathin layer.

**Movie S3.** Represents a similar impact from a  $45^\circ$  view angle. The impact conditions are identical as well.

**Movie S4.** Represents the two different types of jet formations, singular jets, and compound jets and how the jet type affects the pinch-off modes and consequently the number of formed secondary droplets. The singular jet is resulted from an impact with relatively lower impact  $We_e$  numbers, but it has a higher number of secondary droplets formed. Evidently, the thicker jet needs more upward velocity/energy to onset necking and pinch-off as it contains a larger volume of liquid, compared to that of the singular jet.
