# Supplementary material
Source: MDPI journal article supplement (https://www.mdpi.com/2311-5521/9/4/82)
Supplement: s1 [file s1]

Archive with 5 entries (5 files):
- 02. SUPPORTING INFORMATION.pdf
- MOVIE S1.mp4
- MOVIE S2.mp4
- MOVIE S3.mp4
- MOVIE S4.mp4
